# Supplementary material for: A copper–palladium/reduced graphene oxide composite as a catalyst for the oxygen reduction reaction
Source: Royal Society of Chemistry journal article supplement (doi:10.1039/d3nj05918a), 2024-01-01
Supplement: d3nj05918a1.pdf [file d3nj05918a1.pdf]

**Supplementary information for**  
**Copper-Palladium/Reduced Graphene Oxide Composite as a Catalyst for the Oxygen**  
**Reduction Reaction**

*Vasiliy Brusko,<sup>a,b</sup> Anna Prytkova,<sup>a,b</sup> Maria Kirsanova,<sup>c</sup> Iskander Vakhitov,<sup>d</sup> Aigul Sabirova,<sup>b,e</sup>  
Dmitrii Tayurskii,<sup>d</sup> Marsil Kadirov,<sup>b,e\*</sup> and Ayrat M. Dimiev<sup>a,b\*</sup>*

*<sup>a</sup>Laboratory for Advanced Carbon Nanomaterials, Kazan Federal University, Kremlevskaya st. 18, Kazan, Russian Federation, 420008*

*<sup>b</sup>Laboratory “Materials for Green Energy and Sustainability”, Kazan Federal University, Kremlevskaya st. 18, Kazan, Russian Federation, 420008*

*<sup>c</sup>Advanced Imaging Core Facility, Skolkovo Institute of Science and Technology, 121205 Moscow, Russian Federation*

*<sup>d</sup>Institute of Physics, Kazan Federal University, Kremlevskaya st. 18, Kazan, Russian Federation, 420008*

*<sup>e</sup>Arbuzov Institute of Organic and Physical Chemistry, FRC Kazan Scientific Center, Russian Academy of Sciences, Kazan, Russian Federation 420088*

*\*Corresponding author: E-mail: [AMDimiev@kpfu.ru](mailto:AMDimiev@kpfu.ru) (Ayrat Dimiev), and [kamaka59@gmail.com](mailto:kamaka59@gmail.com) (Marsil Kadirov)*

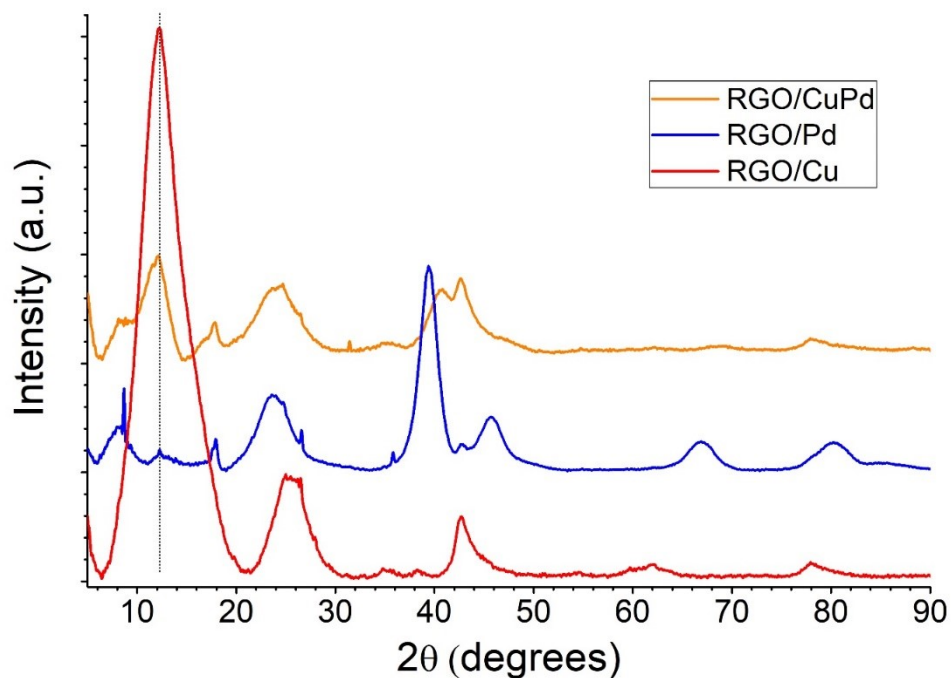

**Figure S1.** XRD patterns of the three RGO/metal composites.

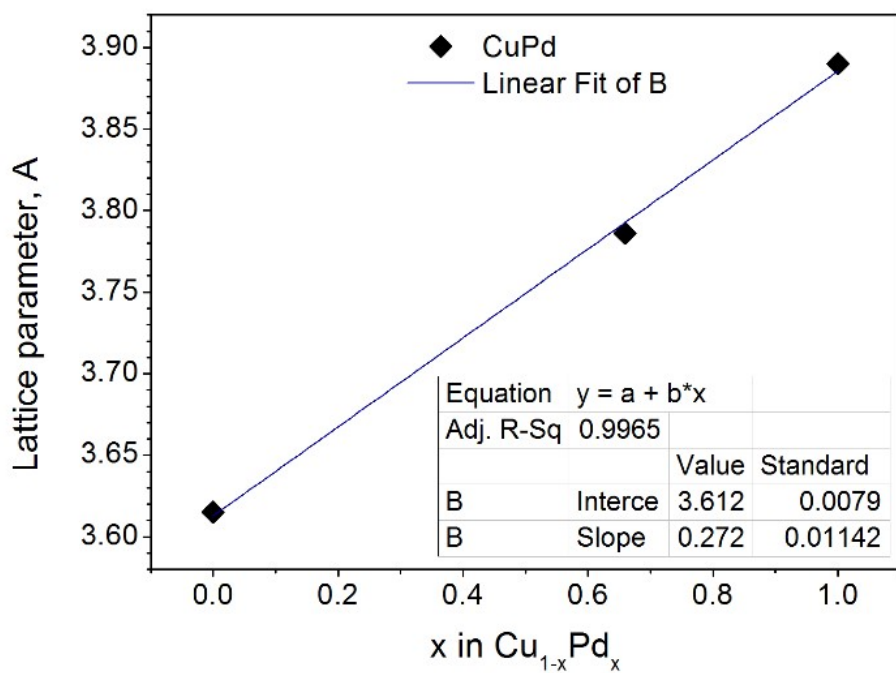

**Figure S2.** The lattice parameter  $a$  versus atomic fraction  $x$  for the  $\text{Cu}_{1-x}\text{Pd}_x$  alloy (black diamonds) and the linear fit (blue line). The parameters of linear fit are given as inset.

\* The lattice parameters  $a = 3.615 \text{ \AA}$  and  $3.890 \text{ \AA}$  for metallic Cu and Pd, respectively, were taken from the PDF2 powder X-ray diffraction database (card numbers [4-836] and [46-1043]). The lattice parameter  $a = 3.78 \text{ \AA}$  of CuPd alloy was calculated from XRD data in Fig. 1, orange curve.

**Table S1.** The results of quantitative STEM-EDX analysis for mixed CuPd nanoparticles in RGO/CuPd composite.

| Element | Line Family | Atomic Fraction (%) |       |       |       | Average   | St. deviation |
|---------|-------------|---------------------|-------|-------|-------|-----------|---------------|
|         |             | 1                   | 2     | 3     | 4     |           |               |
| Cu      | K           | 28.68               | 32.78 | 31.82 | 42.99 | <b>34</b> | <b>6</b>      |
| Pd      | L           | 71.32               | 67.22 | 68.18 | 57.01 | <b>66</b> | <b>6</b>      |

**Table S2.** The results of quantitative STEM-EDX analysis, showing the **overall** Cu and Pd mass fractions in RGO/CuPd composite.

| Element | Line Family | Mass Fraction (%) |       |       | Average   | St. deviation |
|---------|-------------|-------------------|-------|-------|-----------|---------------|
|         |             | 1                 | 2     | 3     |           |               |
| Cu      | K           | 50.35             | 39.69 | 32.91 | <b>45</b> | <b>8</b>      |
| Pd      | L           | 49.65             | 60.31 | 67.09 | <b>55</b> | <b>8</b>      |

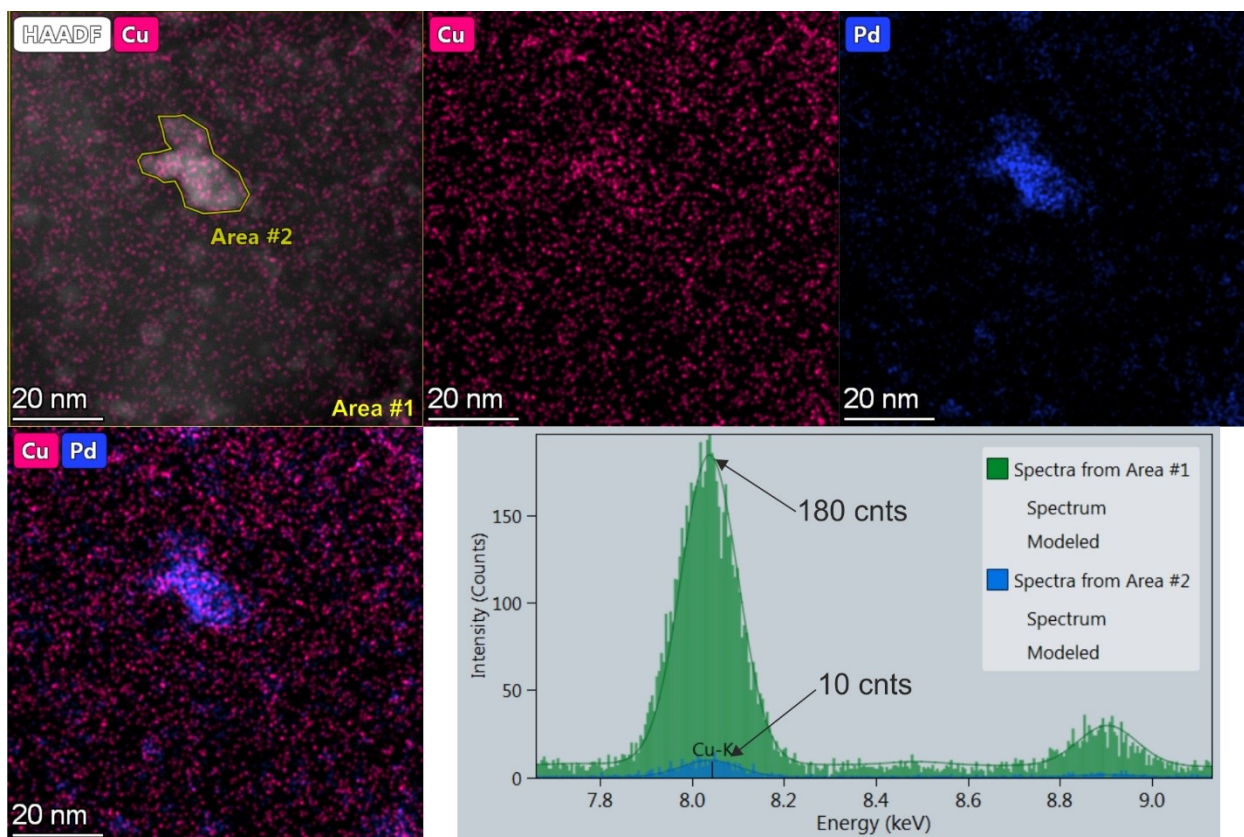

**Figure S3.** Individual and mixed compositional EDX maps of RGO/CuPd composite. EDX spectra taken from the whole field of view and CuPd nanoparticle show the difference in the intensity of Cu-K lines.

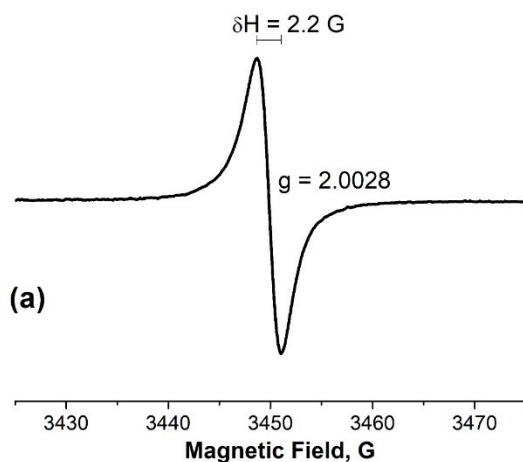

**Figure S4.** EPR spectrum for GO

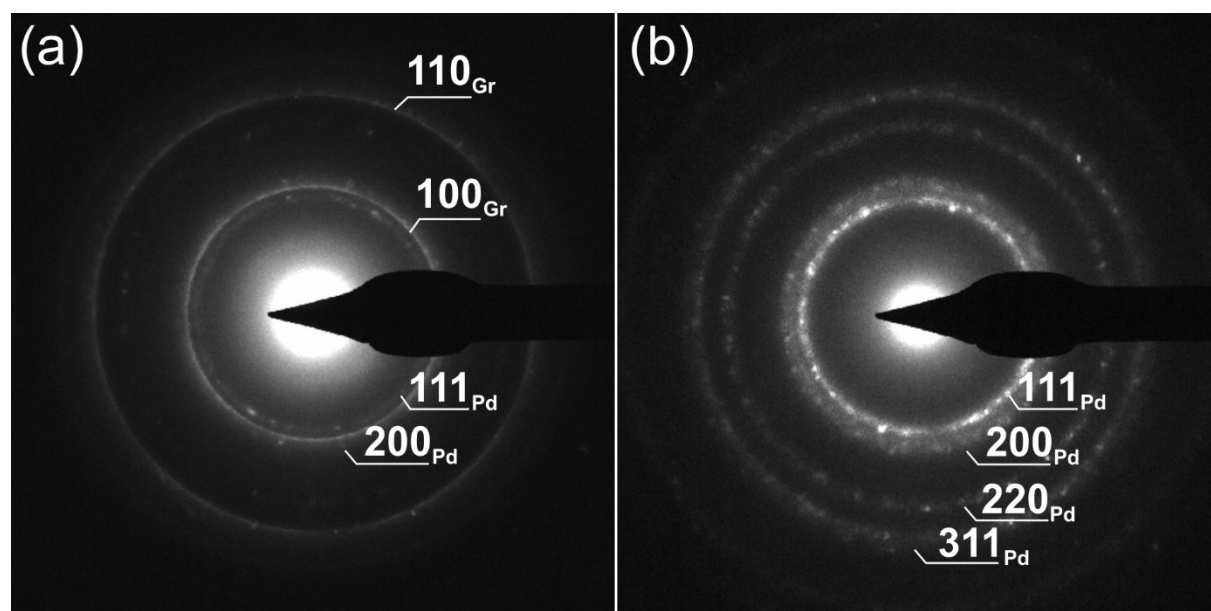

**Figure S5.** Electron diffraction pattern for RGO/Pd, acquired from the two different areas of the same RGO/Pd flake. (a) The regular area, evenly covered by individual Pd-NPs. (b) The area with the agglomeration of Pd-NPs.

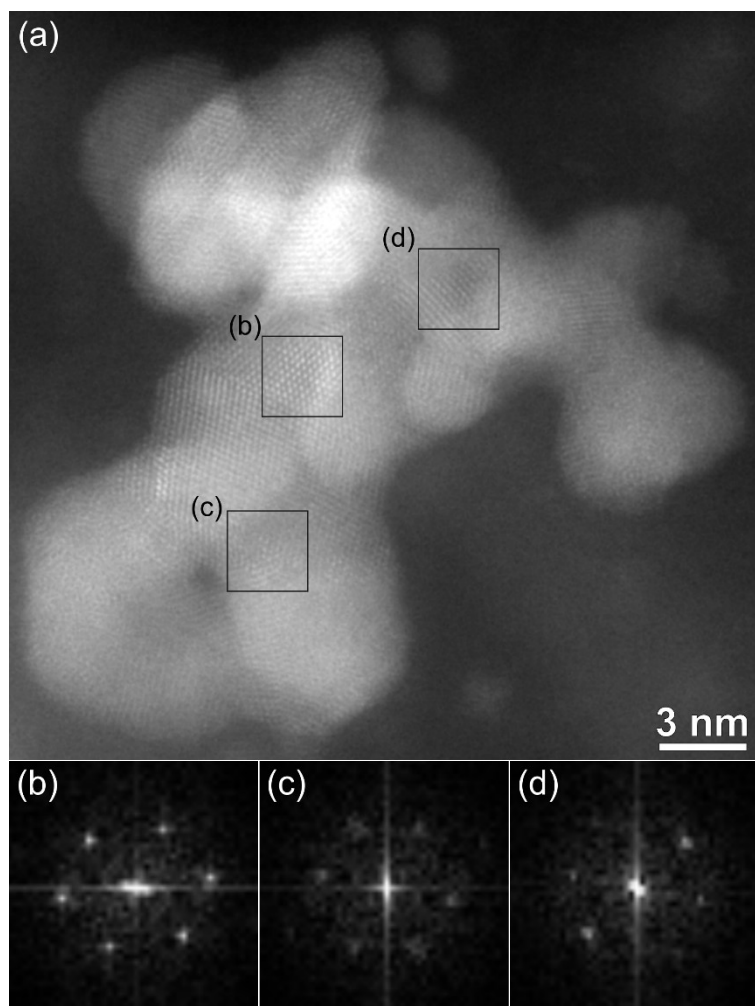

**Figure S6.** HAADF-STEM image of RGO/CuPd (a), and Fourier transform patterns from the areas, labeled by respective letters (b-d).
